# Supplementary material
Source: PubMed Central journal article supplement (PMC4710843)
Supplement: JZUSB17-0076-S1.pdf [file JZUSB17-0076-S1.pdf]

**Table S1 Primers for *SMN2* CGIs cloning sequencing**

| Name           | Sequence (5'→3')                |
|----------------|---------------------------------|
| CGI1 cloning F | TGT AAT TTT AGT ATT TTG GGA GGT |
| CGI1 cloning R | TTA ATC CCC CAA CCT TAT TTA TTA |
| CGI2 cloning F | GAG TTY GAG AYG AGG TTT AAG T   |
| CGI2 cloning R | CTA CGA CCT CAC CTA ACC TAT A   |
| CGI3 cloning F | TAA ATG TGG GAG GGC GAT AAT TAT |
| CGI3 cloning R | AAA AAT AAA CAA AAT AAA CTA CTA |
| CGI4 cloning F | TAG TTA TTT GGA AGG TTT AGG TT  |
| CGI4 cloning R | ATA ACT CAC TCC TTT AAA CCC AA  |
