# Supplementary material
Source: PubMed Central journal article supplement (PMC4710843)
Supplement: JZUSB17-0076-S2.pdf [file JZUSB17-0076-S2.pdf]

**Table S2 Primers for *SMN2* CGIs nested PCR**

| Name          | Sequence (5'→3')                              |
|---------------|-----------------------------------------------|
| CGI1 outer F  | GAT GTT TAA TAA AGA ATA TTG GAG               |
| CGI1 outer R  | AAA TAT TTA ATC CCC CAA CCT TA                |
| CGI1 inner F  | GTA TTT TAG TTT GGG TGA TAG AG                |
| CGI1 inner R  | T7 promoter + TTA ATC CCC CAA CCT TAT TTA TTA |
| CGI2 outer F  | TAA GGG GGA GGG GGA ATA AA                    |
| CGI2 outer R  | ATA ATT ATC RCC CTC CCA CAT TTA               |
| CGI2 inner F  | AGA YGA GGT TTA AGT AAT ATG T                 |
| CGI2 inner R  | T7 promoter + CTC AAT CCT TTC ATT TCA CTA TA  |
| CGI3 outer F  | GTG AAA TGA AAG GAT TGA GAG A                 |
| CGI3 outer R  | CTC CCC CAC ACC AAC CAA AA                    |
| CGI3 inner AF | TAA ATG TGG GAG GGY GAT AAT TAT               |
| CGI3 inner AR | T7 promoter + CTA CRA CCT CAC CTA ACC TAT A   |
| CGI3 inner BF | GTA TAG GTT AGG TGA GGT YGT AG                |
| CGI3 inner BR | T7 promoter + ATA AAC AAA ATA AAC TAC TA      |
| CGI4 outer F  | GTG GTT TTA GTT ATT TGG AAG                   |
| CGI4 outer R  | CTA CCA TAA ACT AAA ATC ATA CC                |
| CGI4 inner AF | GTT TAG GGA GGT GGA GGT TGT                   |
| CGI4 inner AR | T7 promoter + TAT TAA CCA AAA TAA TCT         |
| CGI4 inner BF | AGA TTA TTT TGG TTA ATA                       |
| CGI4 inner BR | T7 promoter + CCA CTA TAC TCC AAC CTA AAC C   |
